# Supplementary material for: Solution-phase controlled synthesis of Cu3NbSe4 nanocrystals for optoelectronic applications
Source: Royal Society of Chemistry journal article supplement (doi:10.1039/d2dt02438a), 2022-01-01
Supplement: d2dt02438a1.pdf [file d2dt02438a1.pdf]

# Solution-phase controlled synthesis of $\text{Cu}_3\text{NbSe}_4$ nanocrystals for optoelectronic applications

Yutong Zhao,<sup>ab</sup> Mengxue Liu,<sup>a</sup> Wenqian Zhang,<sup>ab</sup> Xue Sun,<sup>ab</sup> Wenliang Wang,<sup>\*ab</sup> Wenxiu Zhang,<sup>a</sup> Mengqi Tang,<sup>a</sup> Wenqing Ren,<sup>a</sup> Mingyu Sun,<sup>a</sup> Wenling Feng,<sup>\*ab</sup> and Weihua Wang<sup>ab</sup>

<sup>a</sup>School of Chemistry and Chemical Engineering, Qufu Normal University, Qufu 273165, Shandong, P. R. China

<sup>b</sup>The Key Laboratory of Life-Organic Analysis, Qufu Normal University, Qufu 273165, Shandong, P. R. China

\*E-mail: [wliwang@qfnu.edu.cn](mailto:wliwang@qfnu.edu.cn); [wlfeng21@163.com](mailto:wlfeng21@163.com)

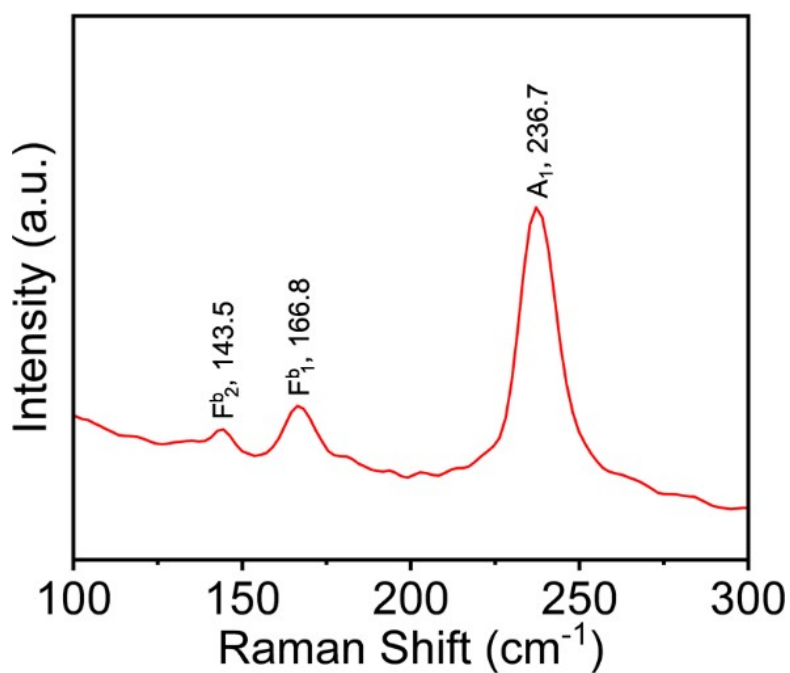

Fig. S1 Raman spectrum of the as-synthesized Cu<sub>3</sub>NbSe<sub>4</sub> nanocrystals.

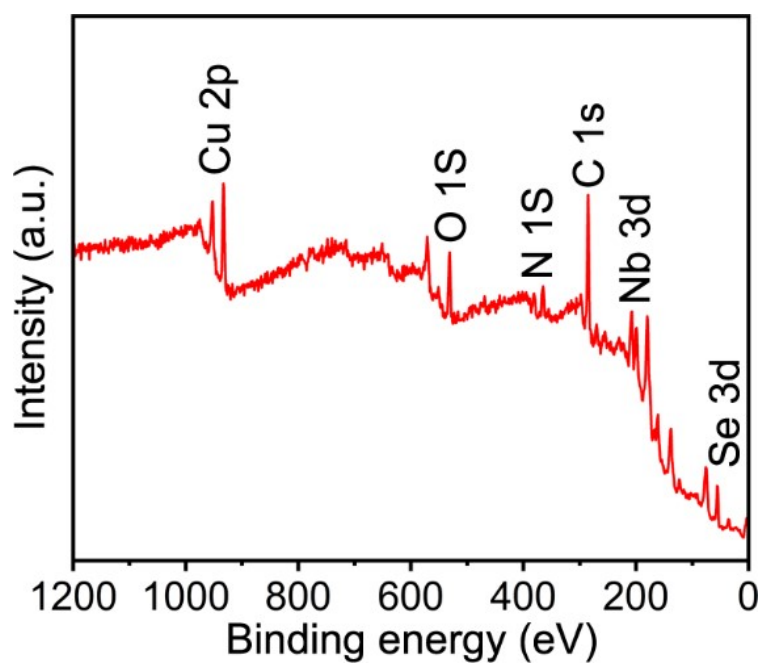

Fig. S2 XPS survey spectrum of the as-synthesized Cu<sub>3</sub>NbSe<sub>4</sub> nanocrystals.

In this work, The XPS peak fitting is performed by XPSPEAK software using a Gaussian-Lorentzian peak shape and a Shirley background.

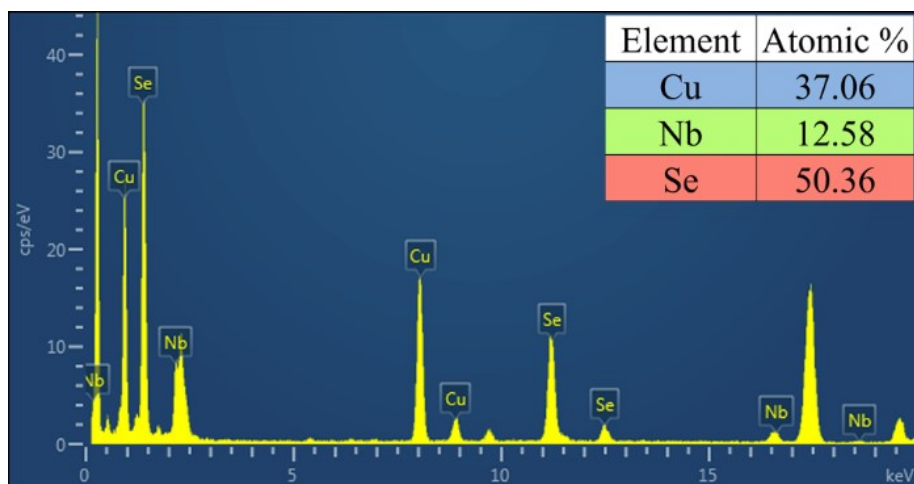

Fig. S3 EDX spectrum of the as-synthesized  $\text{Cu}_3\text{NbSe}_4$  nanocrystals.

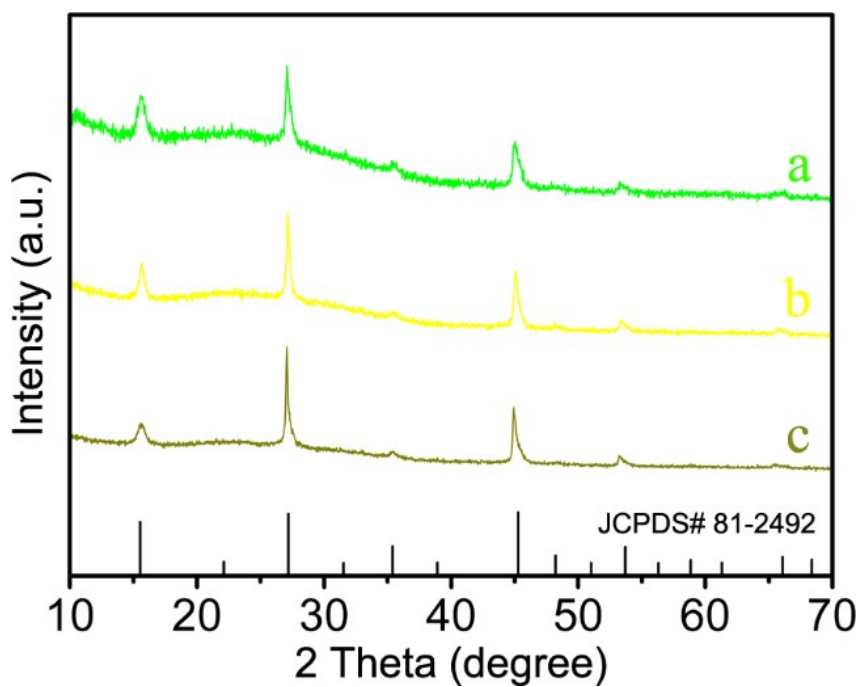

Fig. S4 XRD patterns of the resulting products at 280 °C for 30 min with the increasing of the concentration of OA: (a) in OAm (7.6 mL) with OA (0.4 mL), (b) in OAm (7.2 mL) with OA (0.8 mL), and (c) in OAm (6.8 mL) with OA (1.2 mL).

Table S1. Comparison of the performances of visible light photodetectors.

| Materials                                           | Wavelength (nm) | External bias (V) | Response time (s) | ref.      |
|-----------------------------------------------------|-----------------|-------------------|-------------------|-----------|
| CdTe                                                | 400             | 10                | 0.7/1             | [1]       |
| Sb <sub>2</sub> SeTe <sub>2</sub>                   | 532             | 0.1               | 10                | [2]       |
| SnS <sub>2</sub>                                    | 650             | 5                 | 20/31             | [3]       |
| MoS <sub>2</sub>                                    | 561             | 8                 | 4/9               | [4]       |
| V <sub>0.75</sub> W <sub>0.25</sub> Se <sub>2</sub> | 670             | 0.3               | 1.8/2.9           | [5]       |
| CuInSe <sub>2</sub>                                 | 700             | 0.5               | 10.5/8.4          | [6]       |
| Cu <sub>3</sub> NbSe <sub>4</sub>                   | 400-780         | 1.0               | 0.3/0.1           | this work |

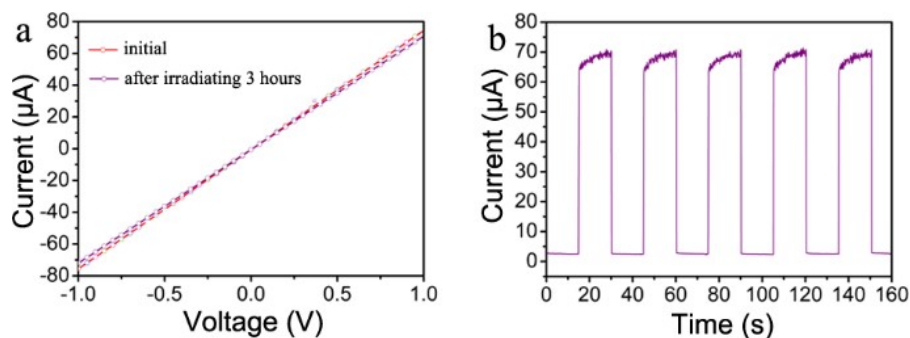

Fig. S5 (a)  $I$ - $V$  curves of initial Cu<sub>3</sub>NbSe<sub>4</sub> photodetector and the device after white light irradiating 3 hours measured in the light. (b) Temporal photoresponse of the device after white light irradiating 3 hours.

## References

- 1 M. Shaygan, K. Davami, N. Kheirabi, C. K. Baek, G. Cuniberti, M. Meyyappan and J.-S. Lee, *Phys. Chem. Chem. Phys.*, 2014, **16**, 22687-22693.
- 2 S.-M. Huang, S.-J. Huang, Y.-J. Yan, S.-H. Yu, M. Chou, H.-W. Yang, Y.-S. Chang and R.-S. Chen, *Sci. Rep.*, 2017, **7**, 45413.
- 3 Y. Tao, X. Wu, W. Wang and J. Wang, *J. Mater. Chem. C*, 2015, **3**, 1347-1353.
- 4 O. Lopez-Sanchez, D. Lembke, M. Kayci, A. Radenovic and A. Kis, *Nat. Nanotechnol.*, 2013, **8**, 497-501.
- 5 P. Pataniya, G. Solanki, K. Patel, V. Pathak and C. Sumesh, *Mater. Res. Express*, 2017, **4**, 106306.
- 6 H. Liu, M. Yu, F. Qin, W. Feng and P. Hu, *ACS Appl. Nano Mater.*, 2018, **1**, 5414-5418.
